# Supplementary material
Source: PubMed Central journal article supplement (PMC3371103)

Supplementary Information

**Multiple apical plasma membrane constituents are associated with susceptibility to meconium ileus in individuals with cystic fibrosis**

Lei Sun<sup>\*1,2</sup>, Johanna M Rommens<sup>\*3,4</sup>, Harriet Corvol<sup>5,6</sup>, Weili Li<sup>1,7</sup>, Xin Li<sup>7</sup>, Theodore Chiang<sup>7</sup>, Fan Lin<sup>3</sup>, Ruslan Dorfman<sup>3</sup>, Pierre-François Busson<sup>8</sup>, Rashmi V Parekh<sup>3</sup>, Diana Zelenika<sup>9</sup>, Scott Blackman<sup>10</sup>, Mary Corey<sup>7</sup>, Vishal Doshi<sup>11</sup>, Lindsay Henderson<sup>11</sup>, Kathleen Naughton<sup>11</sup>, Wanda K O'Neal<sup>12</sup>, Rhonda G Pace<sup>12</sup>, Jaclyn R Stonebraker<sup>12</sup>, Sally D Wood<sup>12</sup>, Fred A Wright<sup>13</sup>, Julian Zielenski<sup>3</sup>, Annick Clement<sup>5,6</sup>, Mitchell L Drumm<sup>14</sup>, Pierre-Yves Boëlle<sup>6,8</sup>, Garry R Cutting<sup>10,11</sup>, Michael R Knowles<sup>12</sup>, Peter R Durie<sup>15,16</sup>, Lisa J Strug<sup>7,1</sup>

*Correspondence should be addressed to Lisa Strug: [lisa.strug@utoronto.ca](mailto:lisa.strug@utoronto.ca)*

\* These authors contributed equally to this work

<sup>1</sup>Biostatistics Division, Dalla Lana School of Public Health, University of Toronto, Toronto, Ontario, Canada.

<sup>2</sup>Department of Statistics, University of Toronto, Toronto, Ontario, Canada.

<sup>3</sup>Program in Genetics and Genome Biology, the Hospital for Sick Children, Toronto, Ontario, Canada.

<sup>4</sup>Department of Molecular Genetics, University of Toronto, Toronto, Ontario, Canada.

<sup>5</sup>AP-HP, Hospital Trousseau, Pediatric Pulmonary Department, Inserm U938, Paris, France

<sup>6</sup>Pierre et Marie Curie University-Paris 6, Paris, France.

<sup>7</sup>Child Health Evaluative Sciences, the Hospital for Sick Children, Toronto, Ontario, Canada.

<sup>8</sup>AP-HP, St Antoine Hospital, Biostatistics Department, Inserm UMR-S707, Paris, France.

<sup>9</sup>Centre National de Génotypage, CEA, Evry, France.

<sup>10</sup>Department of Pediatrics, Johns Hopkins University School of Medicine, Baltimore, Maryland, USA.

<sup>11</sup>McKusick-Nathans Institute of Genetic Medicine, Johns Hopkins University School of Medicine, Baltimore, Maryland, USA.

<sup>12</sup>Cystic Fibrosis-Pulmonary Research and Treatment Center, University of North Carolina at Chapel Hill, Chapel Hill, North Carolina, USA.

<sup>13</sup>Department of Biostatistics, University of North Carolina at Chapel Hill, Chapel Hill, North Carolina, USA.

<sup>14</sup>Departments of Pediatrics and Genetics, Case Western Reserve University, Cleveland, Ohio, USA.

<sup>15</sup>Program in Physiology and Experimental Medicine, the Hospital for Sick Children, Toronto, Ontario, Canada.

<sup>16</sup>Department of Pediatrics, University of Toronto, Toronto, Ontario, Canada.

## Table of Contents

### Supplementary Tables:

|                                                                                                                                                   |   |
|---------------------------------------------------------------------------------------------------------------------------------------------------|---|
| <b>Supplementary Table 1.</b> Sex-specific results for rs3788766 and rs5905283 in <i>SLC6A14</i> .....                                            | 3 |
| <b>Supplementary Table 2.</b> Association results for SNPs in <i>SLC6A14</i> and <i>SLC26A9</i> with and without adjustment for <i>CFTR</i> ..... | 4 |
| <b>Supplementary Table 3.</b> <i>SLC6A14</i> and 157 apical genes with gene-based and Lasso association result.....                               | 5 |

### Supplementary Figures:

|                                                                                                            |    |
|------------------------------------------------------------------------------------------------------------|----|
| <b>Supplementary Figure 1.</b> Q-Q plot of GWAS results prior to prioritization.....                       | 9  |
| <b>Supplementary Figure 2.</b> GWAS results with and without adjusting for the effect of <i>CFTR</i> ..... | 10 |
| <b>Supplementary Figure 3.</b> Manhattan plot of GWAS with 1000 genomes imputation of 7,245,292 SNPs.....  | 11 |
| <b>Supplementary Figure 4.</b> GWAS-HD flow chart .....                                                    | 12 |
| <b>Supplementary Figure 5.</b> SNP rankings from GWAS vs. GWAS-HD.....                                     | 13 |

**Supplementary Table 1. Sex-specific results for rs3788766 and rs5905283 in *SLC6A14*; meconium ileus (MI).**

|                  | Risk Allele | Risk Allele Frequency |              | Sex (Coding of the Risk Allele) | Sample Size (by Genotype) | <i>P</i> value         | OR   | OR 95%CI  |
|------------------|-------------|-----------------------|--------------|---------------------------------|---------------------------|------------------------|------|-----------|
|                  |             | MI                    | Non-MI       |                                 |                           |                        |      |           |
| <b>rs3788766</b> | <b>T</b>    | <b>0.737</b>          | <b>0.591</b> |                                 |                           |                        |      |           |
|                  |             |                       |              | Female (1 vs. 2)                | 816 vs. 671               | $3.20 \times 10^{-5}$  | 1.79 | 1.36 2.37 |
|                  |             |                       |              | Female (0 vs. 2)                | 255 vs. 671               | $2.80 \times 10^{-3}$  | 1.89 | 1.25 2.87 |
|                  |             |                       |              | Male (0 vs. 2)                  | 814 vs. 1207              | $2.10 \times 10^{-9}$  | 2.31 | 1.75 3.04 |
|                  |             |                       |              | All (0 vs. 1 vs. 2)             | 1069 vs. 816 vs. 1878     | $1.28 \times 10^{-12}$ | 1.49 | 1.34 1.67 |
| <b>rs5905283</b> | <b>C</b>    | <b>0.605</b>          | <b>0.505</b> |                                 |                           |                        |      |           |
|                  |             |                       |              | Female (1 vs. 2)                | 849 vs. 488               | $5.50 \times 10^{-4}$  | 1.66 | 1.25 2.22 |
|                  |             |                       |              | Female (0 vs. 2)                | 405 vs. 488               | $8.96 \times 10^{-3}$  | 1.61 | 1.13 2.29 |
|                  |             |                       |              | Male (0 vs. 2)                  | 1014 vs. 1007             | $3.80 \times 10^{-7}$  | 1.91 | 1.49 2.45 |
|                  |             |                       |              | All (0 vs. 1 vs. 2)             | 1419 vs. 849 vs. 1495     | $1.69 \times 10^{-8}$  | 1.33 | 1.21 1.49 |

**Supplementary Table 2. Association results for SNPs in *SLC6A14* and *SLC26A9* with and without adjustment for *CFTR*.** Without adjustment for *CFTR* indicates the results of original GWAS with the site covariate only as in **Figure 1a** and **Table 2**. With adjustment for *CFTR* indicates the results with both the site covariate and the *CFTR* covariate for which Phe508del/Phe508del genotype is coded as 1 and Phe508del/Other or Other/Other genotypes are coded as 0.

| SNP        | CHR | POS       | GENE           | Risk Allele | Without adjustment for <i>CFTR</i> |       |                        | With adjustment for <i>CFTR</i> |       |                        |
|------------|-----|-----------|----------------|-------------|------------------------------------|-------|------------------------|---------------------------------|-------|------------------------|
|            |     |           |                |             | Estimate                           | SE    | <i>P</i>               | Estimate                        | SE    | <i>P</i>               |
| rs4077468  | 1   | 204181380 | <i>SLC26A9</i> | T           | 0.372                              | 0.065 | $9.88 \times 10^{-9}$  | 0.373                           | 0.065 | $9.44 \times 10^{-9}$  |
| rs7512462  | 1   | 204166218 | <i>SLC26A9</i> | T           | 0.371                              | 0.066 | $2.14 \times 10^{-8}$  | 0.371                           | 0.066 | $2.03 \times 10^{-8}$  |
| rs7419153  | 1   | 204183932 | <i>SLC26A9</i> | T           | 0.347                              | 0.065 | $1.01 \times 10^{-7}$  | 0.345                           | 0.065 | $1.22 \times 10^{-7}$  |
| rs12047830 | 1   | 204183322 | <i>SLC26A9</i> | C           | 0.293                              | 0.063 | $3.72 \times 10^{-6}$  | 0.295                           | 0.063 | $3.26 \times 10^{-6}$  |
| rs3788766  | X   | 115480867 | <i>SLC6A14</i> | T           | 0.402                              | 0.057 | $1.28 \times 10^{-12}$ | 0.405                           | 0.057 | $1.02 \times 10^{-12}$ |
| rs5905283  | X   | 115479909 | <i>SLC6A14</i> | C           | 0.294                              | 0.052 | $1.69 \times 10^{-8}$  | 0.296                           | 0.052 | $1.42 \times 10^{-8}$  |
| rs12839137 | X   | 115479578 | <i>SLC6A14</i> | C           | 0.331                              | 0.068 | $1.20 \times 10^{-6}$  | 0.335                           | 0.068 | $1.02 \times 10^{-6}$  |

**Supplementary Table 3. *SLC6A14* and 157 apical genes with gene-based and Lasso association results.** A list of 157 genes was annotated as described in **Figure 2**.

<sup>a</sup> The number of GWAS SNPs within  $\pm 10$  kb of the boundaries of indicated gene.

<sup>b</sup> Permutation based *P* value for the gene. See Online Methods for details.

<sup>c</sup> North American CF Gene Modifier Consortium (NACFGMC) discovery cohort (n=3,763).

<sup>d</sup> French replication cohort (n=1,232); For *SLC6A14* and *SLC26A9*, the combined replication results were used when appropriate, combining the French sample with the independent North American sample (n=1,140, **Table 2**).

<sup>e</sup> Indicating if the gene was in the multivariate model selected by Lasso in the discovery sample; 1=yes, 0=no.

<sup>f</sup> Two apical genes (*MSN* and *SLC34A3* at the end of the table) that were not tagged by GWAS SNPs passing the QC criteria.

<sup>g</sup> *CFTR* showed some evidence for association with meconium ileus possibly reflecting the CF mutations that are present.

<sup>h</sup> For *MUC20*, there were no GWAS SNPs passing the QC criteria in the French data.

<sup>i</sup> Evidence for association of *SLC26A9* to meconium ileus was apparent in the North American portion of the replication sample, but was not in the French cohort portion. It remains unclear if this difference is a reflection of chance and limited power due to the smaller sample size of the French cohort, or if there are actual differences in the studied populations.

<sup>j</sup> *SLC6A14* was not annotated by AmiGO on March 28, 2010 as localized to the apical plasma membrane, thus it was not included in the analysis restricted to the apical gene list

| GENE                        | CHR | # SNPs <sup>a</sup> | Gene <i>P</i> value <sup>b</sup> |                          | Lasso <sup>e</sup> |
|-----------------------------|-----|---------------------|----------------------------------|--------------------------|--------------------|
|                             |     |                     | Discovery <sup>c</sup>           | Replication <sup>d</sup> |                    |
| <i>SLC6A14</i> <sup>j</sup> | X   | 15                  | <0.0001                          | <0.001                   | 0                  |
| <i>ABCA7</i>                | 19  | 18                  | 0.9832                           | 0.03                     | 0                  |
| <i>ABCB4</i>                | 7   | 43                  | 0.5761                           | 0.344                    | 1                  |
| <i>ABCC2</i>                | 10  | 34                  | 0.2613                           | 0.835                    | 0                  |
| <i>ABCC6</i>                | 16  | 31                  | 0.0565                           | 0.628                    | 1                  |
| <i>ABCG5</i>                | 2   | 26                  | 0.2233                           | 0.676                    | 0                  |
| <i>ABCG8</i>                | 2   | 41                  | 0.0261                           | 0.23                     | 1                  |
| <i>ACY3</i>                 | 11  | 7                   | 0.6527                           | 0.305                    | 0                  |
| <i>ADAM17</i>               | 2   | 9                   | 0.3567                           | 0.228                    | 0                  |
| <i>ADRB2</i>                | 5   | 15                  | 0.4085                           | 0.304                    | 0                  |
| <i>AJAP1</i>                | 1   | 50                  | 0.788                            | 0.859                    | 0                  |
| <i>AKAP7</i>                | 6   | 29                  | 0.6997                           | 0.286                    | 0                  |
| <i>AKR1A1</i>               | 1   | 5                   | 0.5602                           | 0.168                    | 0                  |
| <i>ANK2</i>                 | 4   | 116                 | 0.6156                           | 0.85                     | 1                  |
| <i>ANXA6</i>                | 5   | 53                  | 0.4416                           | 0.369                    | 1                  |
| <i>AQP1</i>                 | 7   | 10                  | 0.8664                           | 0.489                    | 0                  |
| <i>AQP2</i>                 | 12  | 6                   | 0.5037                           | 0.596                    | 0                  |
| <i>AQP5</i>                 | 12  | 4                   | 0.4272                           | 0.402                    | 0                  |
| <i>AQP8</i>                 | 16  | 6                   | 0.9199                           | 0.56                     | 0                  |
| <i>ATP1B1</i>               | 1   | 22                  | 0.8975                           | 0.992                    | 0                  |
| <i>ATP2B2</i>               | 3   | 62                  | 0.0006                           | 0.283                    | 1                  |

|                         |    |     |        |       |   |
|-------------------------|----|-----|--------|-------|---|
| <i>ATP4A</i>            | 19 | 11  | 0.5505 | 0.763 | 0 |
| <i>ATP6V0A4</i>         | 7  | 39  | 0.8663 | 0.95  | 0 |
| <i>ATP6V0D1</i>         | 16 | 4   | 0.1689 | 0.956 | 0 |
| <i>ATP6V0D2</i>         | 8  | 20  | 0.1898 | 0.918 | 0 |
| <i>ATP6V1B1</i>         | 2  | 13  | 0.6323 | 0.338 | 0 |
| <i>ATP6V1E1</i>         | 22 | 12  | 0.8157 | 0.045 | 0 |
| <i>ATP8B1</i>           | 18 | 27  | 0.0123 | 0.108 | 1 |
| <i>CA4</i>              | 17 | 6   | 0.1653 | 0.267 | 0 |
| <i>CACNB3</i>           | 12 | 4   | 0.8725 | 0.417 | 0 |
| <i>CAV1</i>             | 7  | 15  | 0.1856 | 0.604 | 1 |
| <i>CD300LG</i>          | 17 | 3   | 0.6072 | 0.611 | 0 |
| <i>CD44</i>             | 11 | 53  | 0.3061 | 0.168 | 1 |
| <i>CDHR2</i>            | 5  | 9   | 0.167  | 0.596 | 0 |
| <i>CFTR<sup>g</sup></i> | 7  | 49  | 0.0053 | 0.001 | 0 |
| <i>CIB1</i>             | 15 | 6   | 0.5588 | 0.607 | 0 |
| <i>CLCA4</i>            | 1  | 8   | 0.3229 | 0.466 | 0 |
| <i>CRB1</i>             | 1  | 27  | 0.3027 | 0.179 | 0 |
| <i>CRB3</i>             | 19 | 6   | 0.3403 | 0.763 | 0 |
| <i>CSPG4</i>            | 15 | 5   | 0.1625 | 0.43  | 1 |
| <i>CTSB</i>             | 21 | 6   | 0.0021 | 0.201 | 1 |
| <i>CUBN</i>             | 10 | 144 | 0.2361 | 0.393 | 1 |
| <i>DPEP1</i>            | 16 | 2   | 0.0946 | 0.755 | 0 |
| <i>DPP4</i>             | 2  | 12  | 0.3709 | 0.591 | 1 |
| <i>DUOX1</i>            | 15 | 13  | 0.7363 | 0.317 | 0 |
| <i>DUOX2</i>            | 15 | 6   | 0.7511 | 0.267 | 0 |
| <i>EGFR</i>             | 7  | 78  | 0.8477 | 0.041 | 1 |
| <i>ENPEP</i>            | 4  | 26  | 0.5939 | 0.757 | 0 |
| <i>ERBB2</i>            | 17 | 2   | 0.0701 | 0.853 | 1 |
| <i>ERBB3</i>            | 12 | 4   | 0.3871 | 0.68  | 0 |
| <i>EZR</i>              | 6  | 10  | 0.0317 | 0.023 | 0 |
| <i>F2RL2</i>            | 5  | 19  | 0.7075 | 0.188 | 0 |
| <i>GIF</i>              | 11 | 1   | 0.4834 | 0.039 | 0 |
| <i>GJB6</i>             | 13 | 6   | 0.8792 | 0.939 | 0 |
| <i>GNAT3</i>            | 7  | 16  | 0.0365 | 0.957 | 0 |
| <i>GPR64</i>            | 23 | 20  | 0.6066 | 0.51  | 0 |
| <i>IGFBP2</i>           | 2  | 7   | 0.1872 | 0.586 | 0 |
| <i>IL6R</i>             | 1  | 9   | 0.2712 | 0.031 | 0 |
| <i>INADL</i>            | 1  | 100 | 0.6673 | 0.76  | 0 |
| <i>KCNA1</i>            | 12 | 8   | 0.1868 | 0.638 | 0 |
| <i>KCNE1</i>            | 21 | 28  | 0.9999 | 0.981 | 0 |
| <i>KCNMA1</i>           | 10 | 225 | 0.0955 | 0.129 | 1 |
| <i>KIAA1919</i>         | 6  | 5   | 0.5382 | 0.037 | 0 |
| <i>KNCN</i>             | 1  | 4   | 0.9284 | 0.664 | 0 |
| <i>LCT</i>              | 2  | 11  | 0.799  | 0.036 | 0 |
| <i>LHFPL5</i>           | 6  | 4   | 0.3254 | 0.551 | 0 |
| <i>LMO7</i>             | 13 | 56  | 0.0267 | 0.782 | 1 |
| <i>LRP2</i>             | 2  | 65  | 0.2323 | 0.964 | 1 |
| <i>LZTS1</i>            | 8  | 10  | 0.1894 | 0.072 | 0 |

|                          |    |     |        |       |   |
|--------------------------|----|-----|--------|-------|---|
| <i>MAL</i>               | 2  | 3   | 0.9152 | 0.869 | 0 |
| <i>MAL2</i>              | 8  | 7   | 0.6686 | 0.789 | 0 |
| <i>MGAM</i>              | 7  | 27  | 0.2256 | 0.191 | 1 |
| <i>MIP</i>               | 12 | 5   | 0.914  | 0.768 | 0 |
| <i>MPDZ</i>              | 9  | 31  | 0.788  | 0.781 | 0 |
| <i>MREG</i>              | 2  | 37  | 0.819  | 0.719 | 0 |
| <i>MUC1</i>              | 1  | 3   | 0.3971 | 0.887 | 0 |
| <i>MUC20<sup>h</sup></i> | 3  | 1   | 0.909  | NA    | 0 |
| <i>MUC3A</i>             | 2  | 92  | 0.1207 | 0.498 | 1 |
| <i>MUC3B</i>             | 7  | 5   | 0.4523 | 0.23  | 0 |
| <i>MYO1A</i>             | 12 | 5   | 0.338  | 0.632 | 0 |
| <i>MYO7B</i>             | 2  | 31  | 0.7972 | 0.575 | 0 |
| <i>NAALADL1</i>          | 11 | 6   | 0.456  | 0.878 | 0 |
| <i>NPC1L1</i>            | 7  | 6   | 0.4787 | 0.014 | 0 |
| <i>NRG1</i>              | 8  | 260 | 0.8421 | 0.781 | 1 |
| <i>OTOA</i>              | 16 | 8   | 0.2995 | 0.02  | 0 |
| <i>OTOG</i>              | 11 | 25  | 0.5511 | 0.285 | 0 |
| <i>OXTR</i>              | 3  | 30  | 0.8667 | 0.65  | 0 |
| <i>P2RY1</i>             | 3  | 2   | 0.2739 | 0.569 | 0 |
| <i>P2RY2</i>             | 11 | 11  | 0.5776 | 0.869 | 1 |
| <i>P2RY4</i>             | 23 | 5   | 0.7478 | 0.535 | 0 |
| <i>P2RY6</i>             | 11 | 11  | 0.6034 | 0.327 | 0 |
| <i>PDPN</i>              | 1  | 25  | 0.2071 | 0.244 | 0 |
| <i>PFKM</i>              | 12 | 8   | 0.2429 | 0.616 | 0 |
| <i>PKHD1</i>             | 6  | 84  | 0.0475 | 0.356 | 0 |
| <i>PLB1</i>              | 2  | 56  | 0.8802 | 0.972 | 0 |
| <i>PRKCI</i>             | 3  | 8   | 0.639  | 0.756 | 0 |
| <i>PROM1</i>             | 4  | 59  | 0.2262 | 0.39  | 1 |
| <i>PROM2</i>             | 2  | 2   | 0.4913 | 0.325 | 0 |
| <i>PTK2</i>              | 8  | 38  | 0.079  | 0.088 | 1 |
| <i>RAB14</i>             | 9  | 7   | 0.3595 | 0.214 | 0 |
| <i>RAB27A</i>            | 15 | 25  | 0.3257 | 0.583 | 0 |
| <i>RHCG</i>              | 15 | 5   | 0.1909 | 0.581 | 1 |
| <i>S100G</i>             | 23 | 2   | 0.3144 | 0.916 | 0 |
| <i>SCNN1A</i>            | 12 | 16  | 0.3261 | 0.288 | 0 |
| <i>SCNN1B</i>            | 16 | 18  | 0.4818 | 0.826 | 0 |
| <i>SCNN1G</i>            | 16 | 7   | 0.8408 | 0.911 | 0 |
| <i>SHROOM2</i>           | 23 | 42  | 0.5546 | 0.178 | 1 |
| <i>SHROOM3</i>           | 4  | 92  | 0.4466 | 0.224 | 1 |
| <i>SHROOM4</i>           | 23 | 13  | 0.5186 | 0.778 | 1 |
| <i>SI</i>                | 3  | 10  | 0.7507 | 0.201 | 0 |
| <i>SLC10A2</i>           | 13 | 35  | 0.9229 | 0.433 | 0 |
| <i>SLC11A2</i>           | 12 | 8   | 0.3498 | 0.971 | 0 |
| <i>SLC12A2</i>           | 5  | 18  | 0.6973 | 0.905 | 0 |
| <i>SLC12A3</i>           | 16 | 31  | 0.6003 | 0.702 | 0 |
| <i>SLC14A2</i>           | 18 | 57  | 0.1743 | 0.724 | 1 |
| <i>SLC22A11</i>          | 11 | 4   | 0.7337 | 0.533 | 0 |
| <i>SLC22A12</i>          | 11 | 4   | 0.0451 | 0.863 | 0 |

|                            |    |    |         |       |    |
|----------------------------|----|----|---------|-------|----|
| <i>SLC22A18</i>            | 11 | 14 | 0.9952  | 0.154 | 0  |
| <i>SLC22A4</i>             | 5  | 47 | 0.1902  | 0.663 | 0  |
| <i>SLC22A5</i>             | 5  | 24 | 0.1561  | 0.375 | 1  |
| <i>SLC23A1</i>             | 5  | 1  | 0.2446  | 0.887 | 0  |
| <i>SLC23A2</i>             | 20 | 48 | 0.0884  | 0.218 | 1  |
| <i>SLC26A3</i>             | 7  | 19 | 0.5823  | 0.613 | 0  |
| <i>SLC26A4</i>             | 7  | 21 | 0.9859  | 0.997 | 0  |
| <i>SLC26A9<sup>j</sup></i> | 1  | 39 | <0.0001 | 0.235 | 1  |
| <i>SLC29A4</i>             | 7  | 3  | 0.0703  | 0.754 | 1  |
| <i>SLC30A5</i>             | 5  | 12 | 0.8699  | 0.907 | 0  |
| <i>SLC34A2</i>             | 4  | 12 | 0.5698  | 0.764 | 0  |
| <i>SLC39A4</i>             | 8  | 2  | 0.1793  | 0.492 | 0  |
| <i>SLC3A2</i>              | 11 | 7  | 0.115   | 0.978 | 0  |
| <i>SLC46A1</i>             | 17 | 3  | 0.5825  | 0.145 | 0  |
| <i>SLC4A5</i>              | 2  | 40 | 0.5031  | 0.729 | 0  |
| <i>SLC4A7</i>              | 3  | 22 | 0.5563  | 0.05  | 0  |
| <i>SLC5A1</i>              | 22 | 15 | 0.8685  | 0.435 | 0  |
| <i>SLC5A12</i>             | 11 | 45 | 0.2398  | 0.081 | 1  |
| <i>SLC5A8</i>              | 12 | 24 | 0.5075  | 0.044 | 0  |
| <i>SLC6A20</i>             | 3  | 24 | 0.2724  | 0.564 | 0  |
| <i>SLC7A5</i>              | 16 | 16 | 0.6744  | 0.607 | 0  |
| <i>SLC9A3</i>              | 5  | 10 | 0.0001  | 0.017 | 1  |
| <i>SLC9A3R1</i>            | 17 | 8  | 0.5838  | 0.625 | 0  |
| <i>SLC9A3R2</i>            | 16 | 10 | 0.2069  | 0.091 | 0  |
| <i>SLC9A4</i>              | 2  | 55 | 0.8562  | 0.012 | 0  |
| <i>STK39</i>               | 2  | 64 | 0.9003  | 0.112 | 0  |
| <i>STX3</i>                | 11 | 5  | 0.4133  | 0.71  | 0  |
| <i>STX4</i>                | 16 | 2  | 0.2168  | 0.632 | 0  |
| <i>STXBP3</i>              | 1  | 12 | 0.6591  | 0.502 | 0  |
| <i>TACSTD1</i>             | 2  | 7  | 0.2121  | 0.594 | 0  |
| <i>TCIRG1</i>              | 11 | 11 | 0.6047  | 0.718 | 0  |
| <i>TF</i>                  | 3  | 13 | 0.7929  | 0.498 | 0  |
| <i>TGFBR1</i>              | 9  | 10 | 0.4879  | 0.746 | 0  |
| <i>TLR9</i>                | 3  | 4  | 0.0715  | 0.313 | 0  |
| <i>TRPM6</i>               | 9  | 39 | 0.4276  | 0.723 | 0  |
| <i>TRPV5</i>               | 7  | 6  | 0.3986  | 0.231 | 0  |
| <i>UMOD</i>                | 16 | 14 | 0.2544  | 0.009 | 0  |
| <i>UPK3A</i>               | 22 | 10 | 0.5462  | 0.024 | 0  |
| <i>VANGL2</i>              | 1  | 10 | 0.5457  | 0.284 | 0  |
| <i>MSN<sup>f</sup></i>     | 23 | 0  | NA      | NA    | NA |
| <i>SLC34A3<sup>f</sup></i> | 9  | 0  | NA      | NA    | NA |



**Supplementary Figure 1. QQ-Plot of GWAS results prior to prioritization.** The original GWAS results without prioritization from the GEE model adjusting for the site covariate using the full 3,763 North American samples (see **Figure 1a** for the corresponding Manhattan plot). No violation of model assumptions is evident, and there is significant evidence of association.

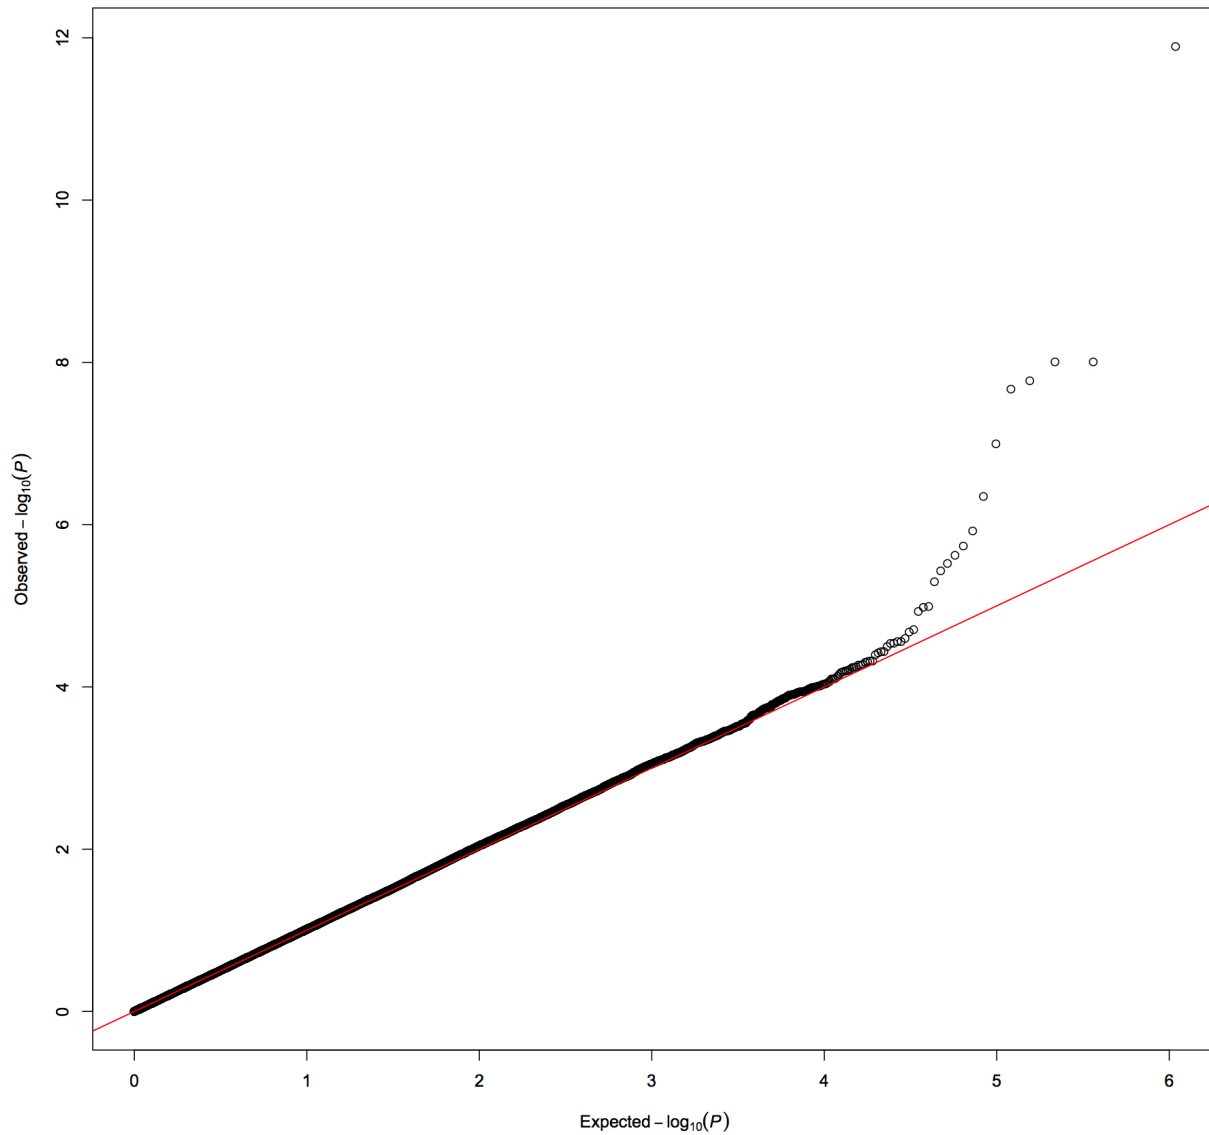

**Supplementary Figure 2. GWAS results with and without adjusting for the effect of *CFTR*.** The x-axis shows the association *P* values (on the  $-\log_{10}$  scale) of the original GWAS with the site covariate but without adjusting for the effect of *CFTR* as in **Figure 1a**; the y-axis shows the association *P* values with both the site covariate and the *CFTR* covariate for which Phe508del/Phe508del genotype is coded as 1 and Phe508del /Other or Other/Other genotypes are coded as 0. SNPs within 155 kb of *CFTR* have been removed from this figure, and the SNPs at the bottom-left that have some noticeable discrepancy between the two sets of analyses are the SNPs that are in LD with *CFTR*.

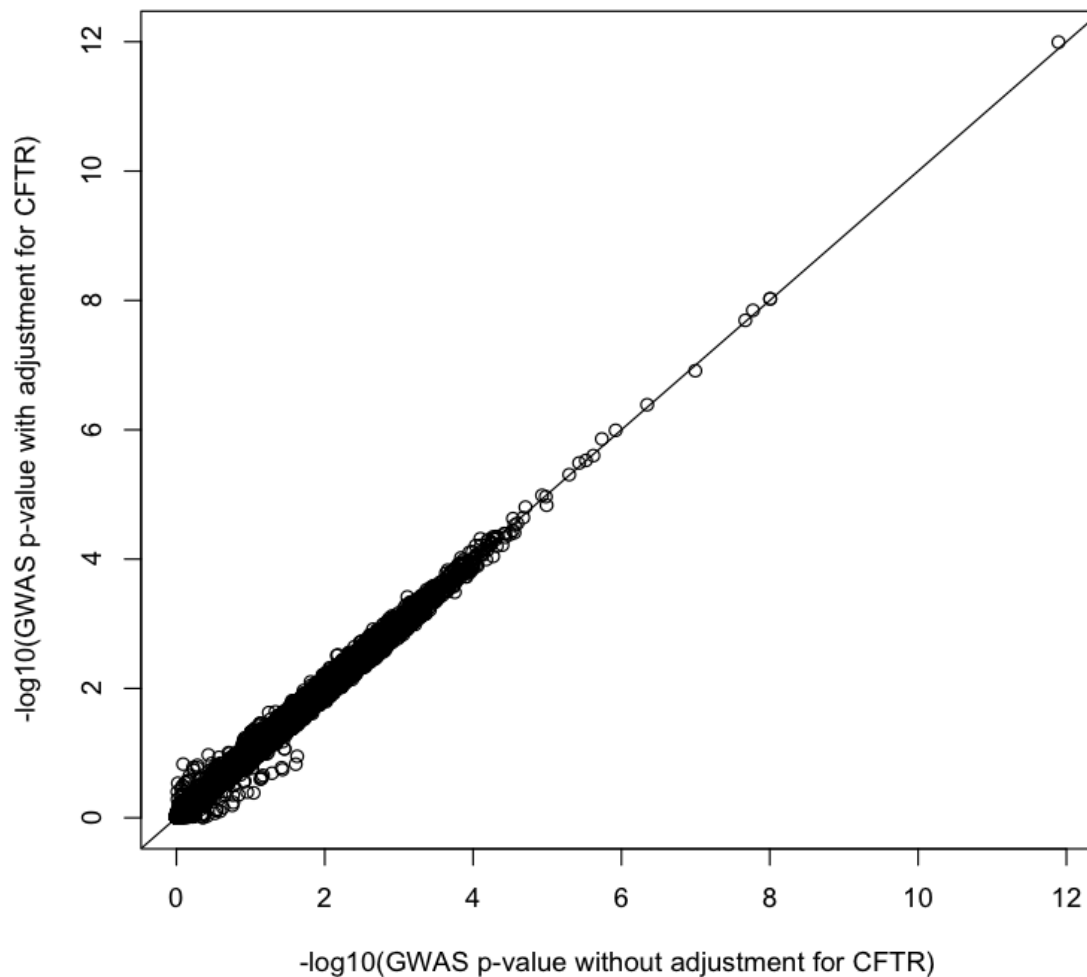

**Supplementary Figure 3. Manhattan plot of GWAS with 1000 genomes imputation of 7,245,292 SNPs.** The reference sample was the 87 CEU subjects extracted from the EUR continental group of the 1000 genomes November 2010 release provided in the four-site (Broad Institute, Michigan University, Boston College and NCBI) merged dataset. The figure only include 78,352 SNPs with  $P$  values < 0.01, with solid circles representing 5,953 genotyped SNPs and empty circles representing 72,399 imputed SNPs.

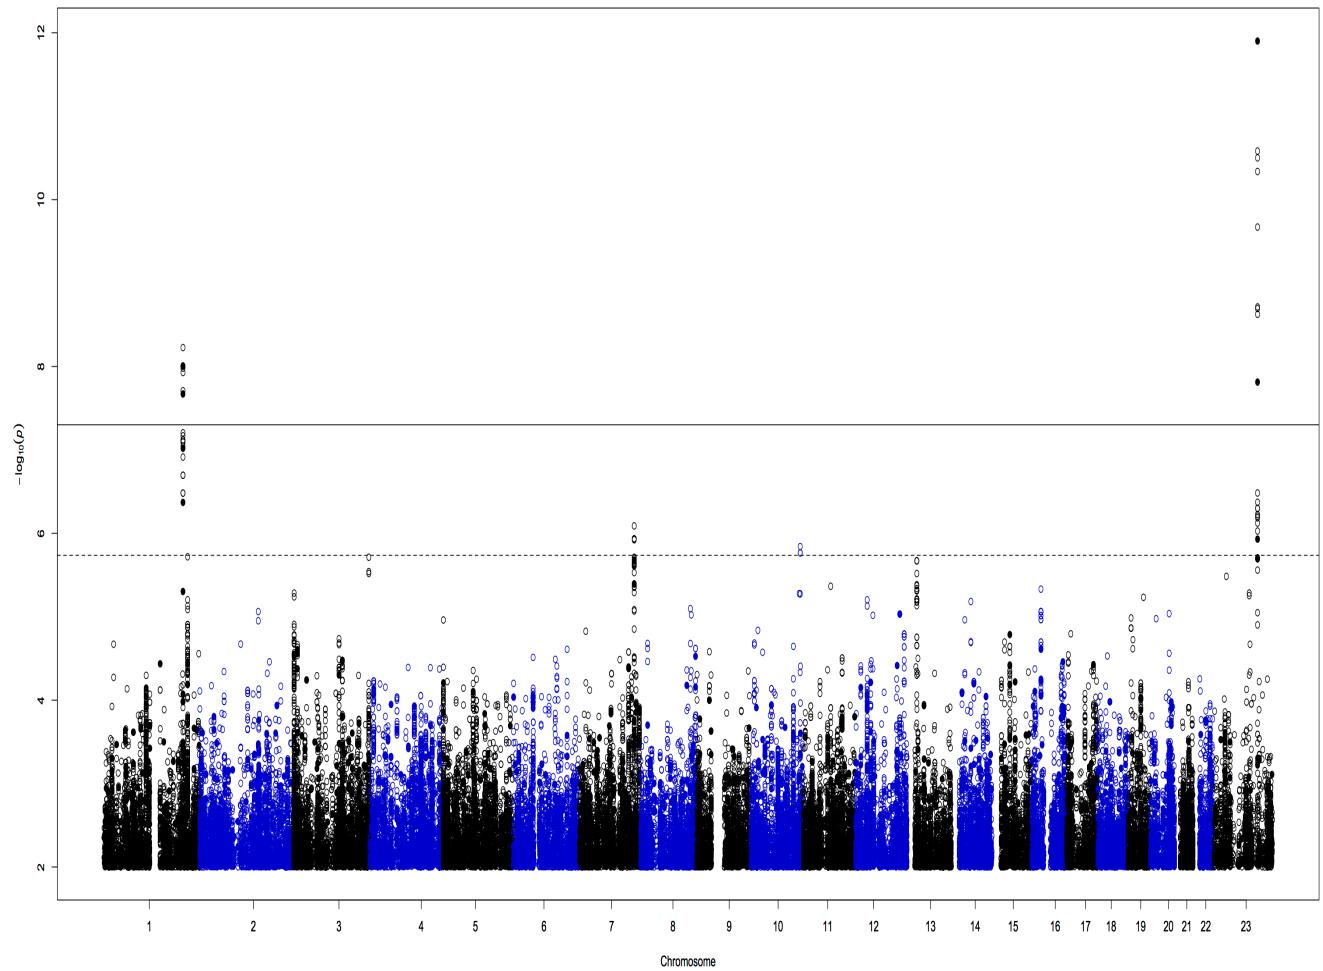

**Supplementary Figure 4. GWAS-HD flow chart.** See Online Methods for details on the single-SNP and multi-SNP/gene analyses.

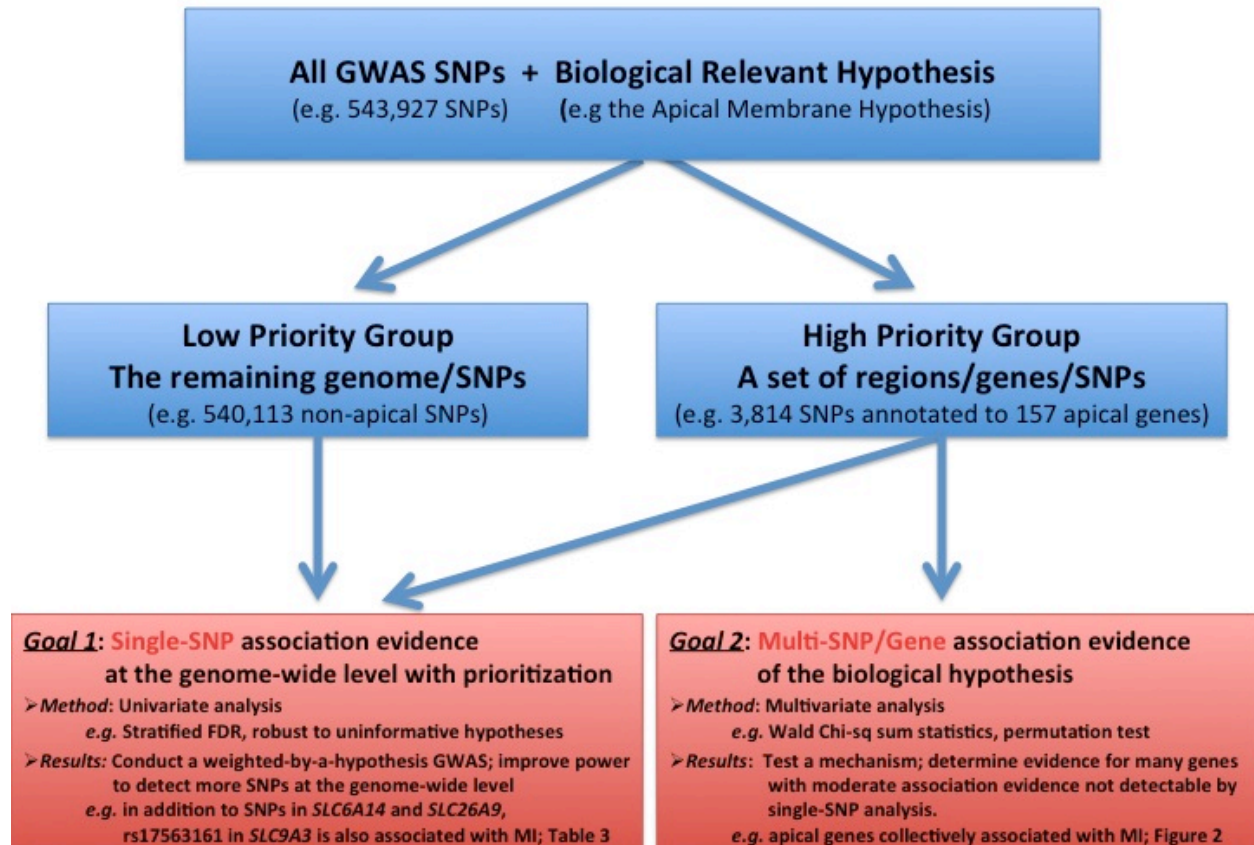

**Supplementary Figure 5. SNP rankings from GWAS vs. GWAS-HD.** GWAS ranks are based on the original association evidence alone and GWAS-HD ranks are based on SFDR weight-adjusted  $q$  values after incorporating the apical plasma membrane hypothesis (Online Methods).

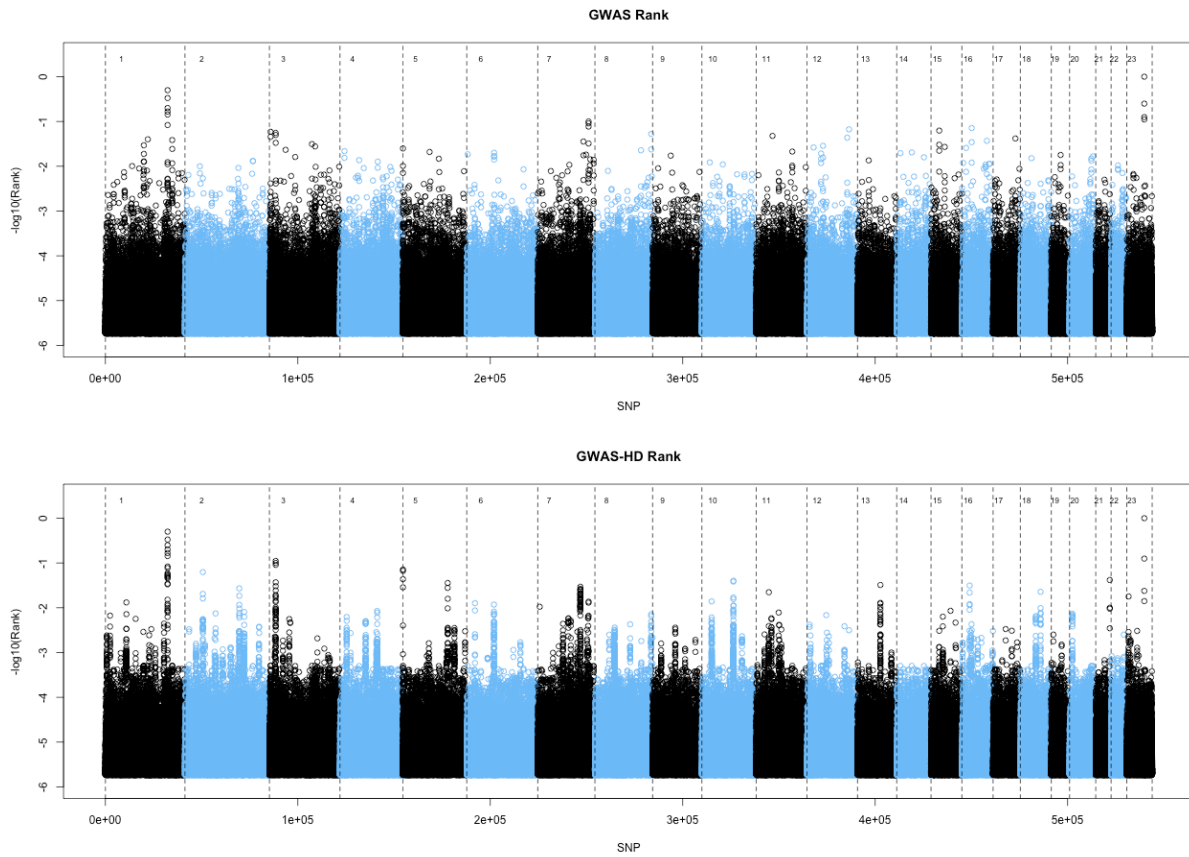

Supplement: NIHMS359534-supplement-1.pdf [file NIHMS359534-supplement-1.pdf]
